# Supplementary material for: Stable polyoxometalate insertion within the mesoporous metal organic framework MIL-100(Fe)
Source: Royal Society of Chemistry journal article supplement (doi:10.1039/c0jm02381g), 2010-11-25
Supplement: c0jm02381g.pdf [file c0jm02381g.pdf]

Supplementary materials caption:

Table S1: Elemental analysis.

Scheme 1a: Two models for building block of MIL-100(Fe)noF (a) and (b), trimeric iron moiety with trimesate (c) and supertetrahedron (d).

Scheme 1b: Representation of the structure isotype to MTN zeolite (each vertex represent a tetrahedron) (a),  $6^45^{12}$  cavity connected together by their four hexagonal windows (b),  $6^45^{12}$  cavity of MIL-100Fe (c),  $\text{PMo}_{12}\text{O}_{40}^{3-}$  with  $d_{\text{O-O}}$  in Å (d), suggestion of  $5^{12}$  cavity of MIL-100Fe with  $\text{PMo}_{12}\text{O}_{40}^{3-}$  (e), suggestion of  $5^{12}$  cavity of MIL-100Fe with  $\text{PMo}_{12}\text{O}_{40}^{3-}$  (f).

Figure S1: X-Ray thermodiffraction patterns performed each 10°C from 20°C to 430°C for MIL-100Fe noF (upper) and  $\text{H}_3\text{PMo}_{12}\text{O}_{40}$ @ MIL-100Fe noF (lower).

Figure S2: X-Ray diffraction patterns of MIL-100(Fe)noF (upper),  $\text{Na}_2\text{HPMo}_{12}\text{O}_{40}$ / MIL-100(Fe)noF and  $\text{H}_3\text{PMo}_{12}\text{O}_{40}$ @MIL-100(Fe)noF.

Figure S3: Nitrogen sorption-desorption isotherms at 78 K ( $P_0=1$  atm.) (a) and Horvath-Kawazoe porous distribution (b) of MIL-100(Fe)noF (1),  $\text{Na}_2\text{HPMo}_{12}\text{O}_{40}$ /MIL-100(Fe)noF (2) and MIL-100(Fe) synthesised in presence of  $\text{H}_3\text{PMo}_{12}\text{O}_{40}$  (3).

Table S1: Elemental analysis

|        | MIL-100Fe noF |      | H <sub>3</sub> PMo <sub>12</sub> O <sub>40</sub> @<br>MIL-100Fe noF |      | Na <sub>2</sub> HPMo <sub>12</sub> O <sub>40</sub> /<br>MIL-100Fe noF |      |
|--------|---------------|------|---------------------------------------------------------------------|------|-----------------------------------------------------------------------|------|
|        |               | théo |                                                                     | théo |                                                                       | théo |
| Fe     | 19,58         |      | 11,51                                                               |      | 15,87                                                                 |      |
| C      | 26,39         |      | 20,00                                                               |      | 18,80                                                                 |      |
| P      | /             |      | 0,76                                                                |      | 0,12                                                                  |      |
| Mo     | /             |      | 18,85                                                               |      | 3,76                                                                  |      |
| Na     | /             |      | /                                                                   |      | 0,14                                                                  |      |
| Cl     | <200ppm       |      | <200ppm                                                             |      | <200ppm                                                               |      |
| C/Fe   | 6,27          | 6    | 8,09                                                                | 6    | 5,5                                                                   | 6    |
| Mo/Fe  | /             |      | 0,95                                                                |      | 0,14                                                                  |      |
| Na/HPA | /             |      | /                                                                   |      | 1,75                                                                  |      |

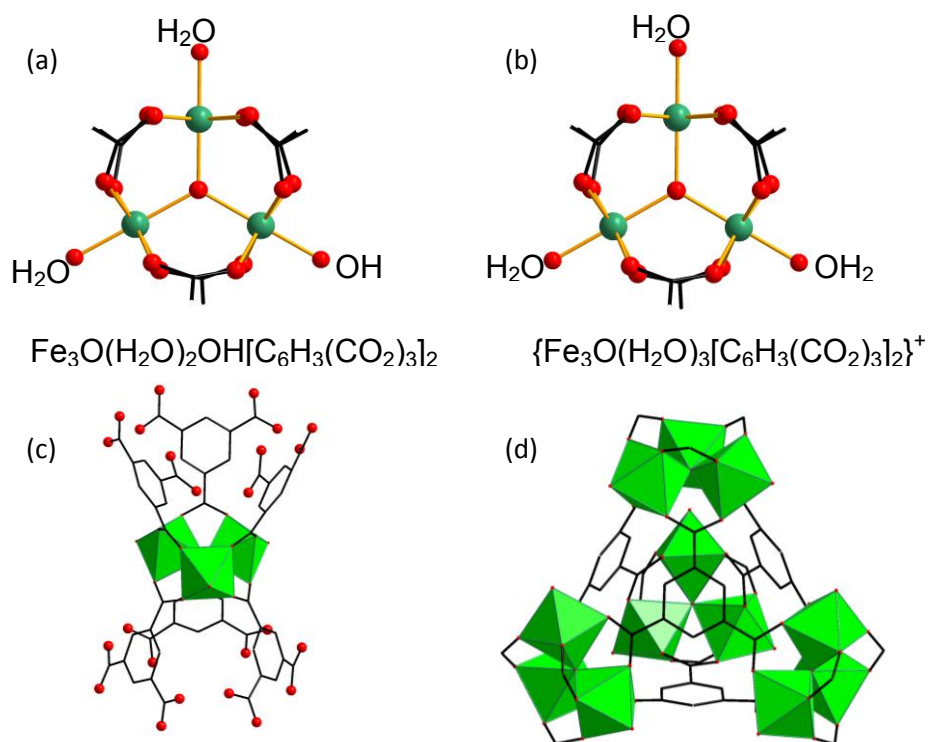

Scheme 1a: Two models for building block of MIL-100(Fe)noF (a) and (b), trimeric iron moiety with trimesate (c) and supertetrahedron (d).

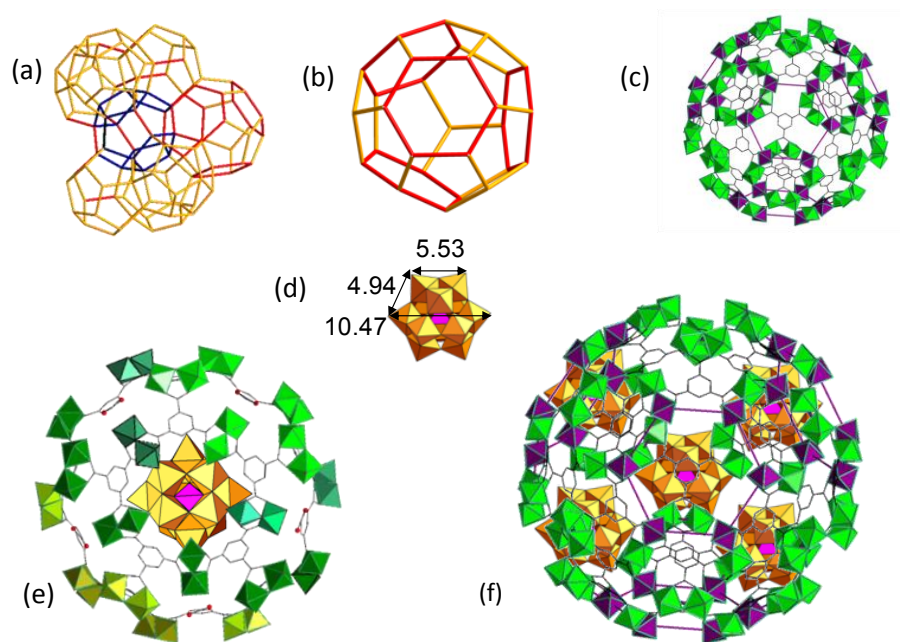

Scheme 1b: Representation of the structure isotype to MTN zeolite (each vertex represents a tetrahedron) (a),  $6^4 5^{12}$  cavity connected together by their four hexagonal windows (b),  $6^4 5^{12}$  cavity of MIL-100Fe (c),  $\text{PMo}_{12}\text{O}_{40}^{3-}$  with  $d_{\text{O-O}}$  in Å (d), suggestion of  $5^{12}$  cavity of MIL-100Fe with  $\text{PMo}_{12}\text{O}_{40}^{3-}$  (e), suggestion of  $5^{12}$  cavity of MIL-100Fe with  $\text{PMo}_{12}\text{O}_{40}^{3-}$  (f).

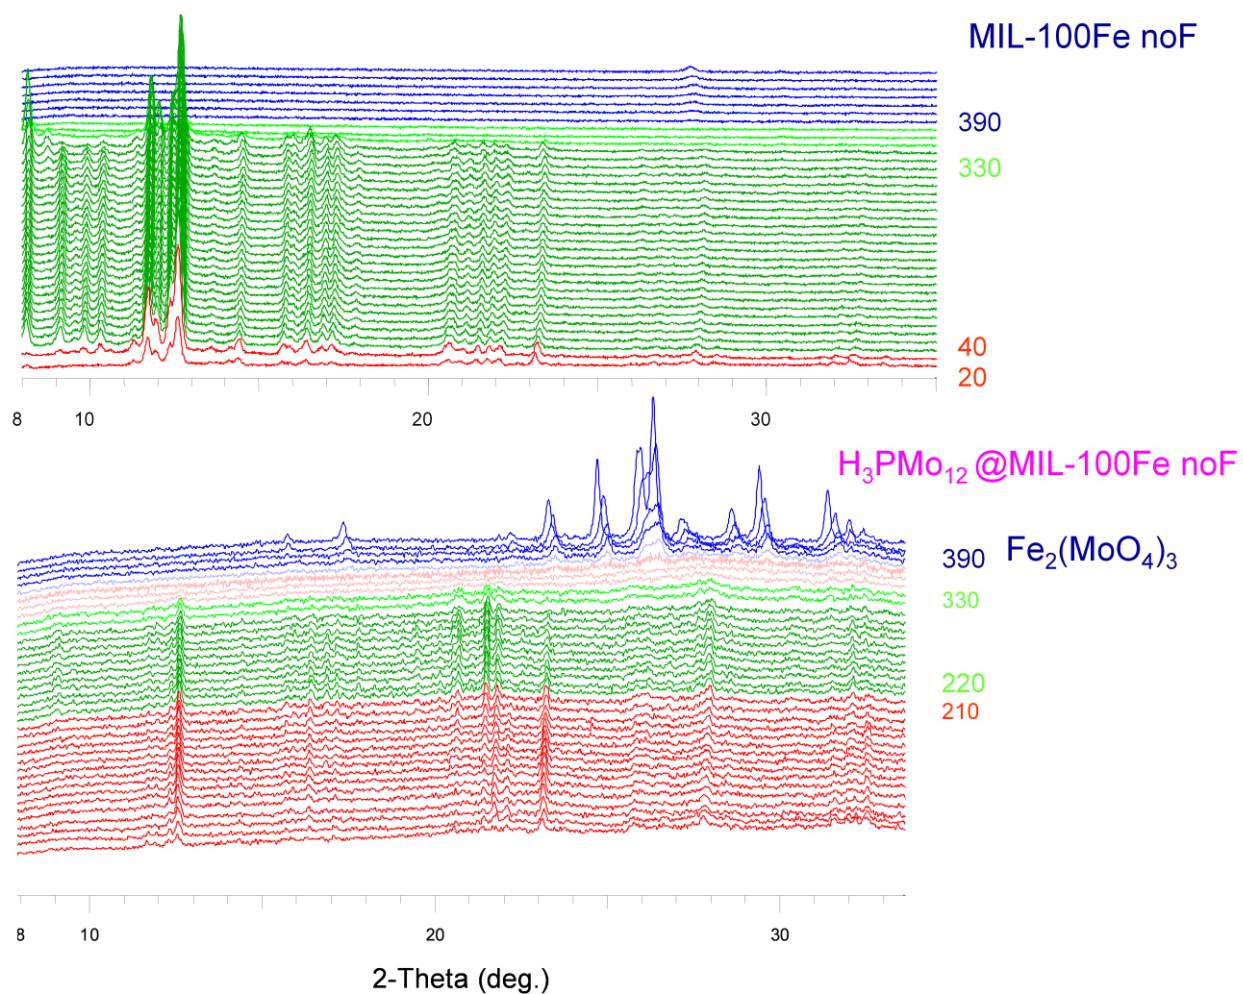

Figure S1: X-Ray thermogravimetric analysis (XRD) patterns performed each 10 °C from 20 °C to 430 °C for MIL-100Fe noF (upper) and H<sub>3</sub>PMo<sub>12</sub>@ MIL-100Fe noF (lower).

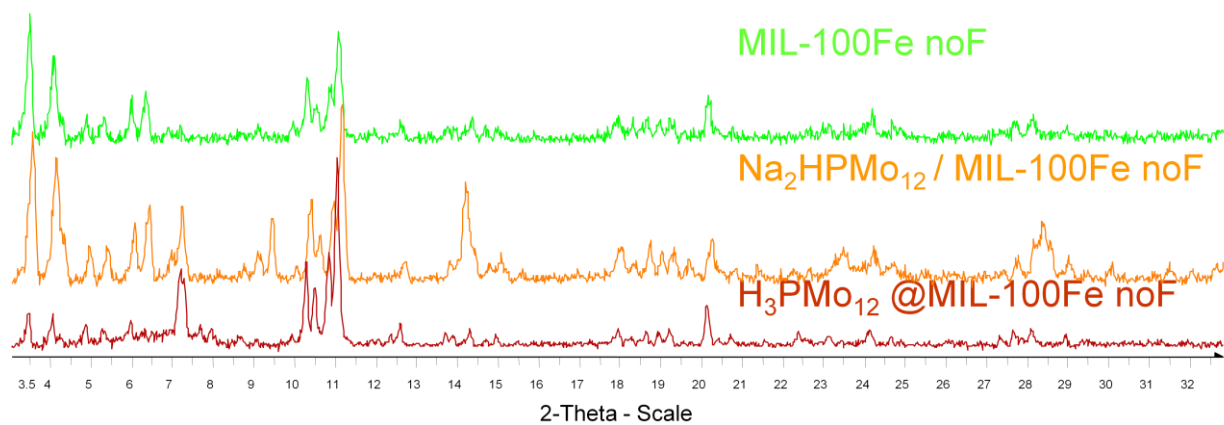

Figure S2: X-Ray diffraction patterns of MIL-100(Fe)noF( upper), Na<sub>2</sub>HPMo<sub>12</sub>O<sub>40</sub>/ MIL-100(Fe)noF and H<sub>3</sub>PMo<sub>12</sub>O<sub>40</sub>@MIL-100(Fe)noF.

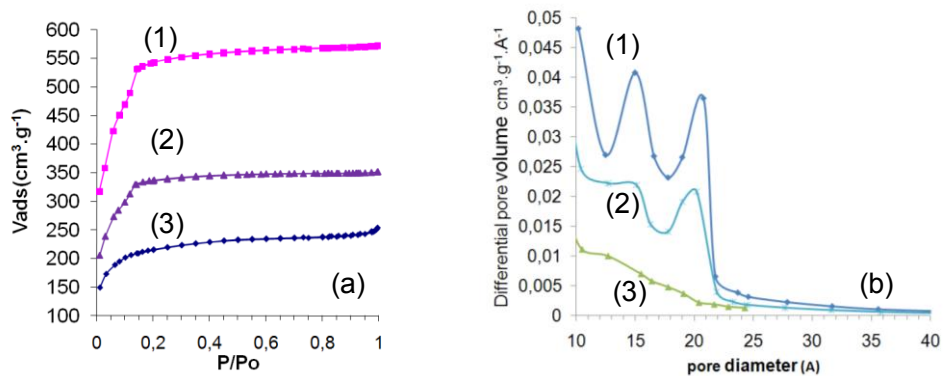

Figure S3: Nitrogen sorption-desorption isotherms at 78 K ( $P_0=1$  atm.) (a) and Horvath-Kawazoe porous distribution (b) of MIL-100(Fe)noF (1) ,  $\text{Na}_2\text{HPMo}_{12}/\text{MIL-100(Fe)noF}$  (2) and MIL-100(Fe) synthesised in presence of  $\text{H}_3\text{PMo}_{12}\text{O}_{40}$  (3).
